# Supplementary material for: In situ synthesis of lanthanide complexes supported by a ferrocene diamide ligand: extension to redox-active lanthanide ions
Source: Royal Society of Chemistry journal article supplement (doi:10.1039/c5nj01402f), 2015-01-01
Supplement: c5nj01402f1.pdf [file c5nj01402f1.pdf]

*Supporting Information for*

**In situ Synthesis of Lanthanide Complexes Supported  
by a Ferrocene Diamide Ligand: Extension to Redox-Active  
Lanthanide Ions**

*Wenliang Huang, Jonathan L. Brosmer, and Paula L. Diaconescu\**

Department of Chemistry and Biochemistry, University of California, Los Angeles, 607 Charles E  
Young Drive East, Los Angeles, CA 90095

**Table of Contents**

|                                  |    |
|----------------------------------|----|
| X-Ray Crystallography Data ..... | S2 |
|----------------------------------|----|

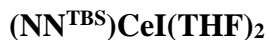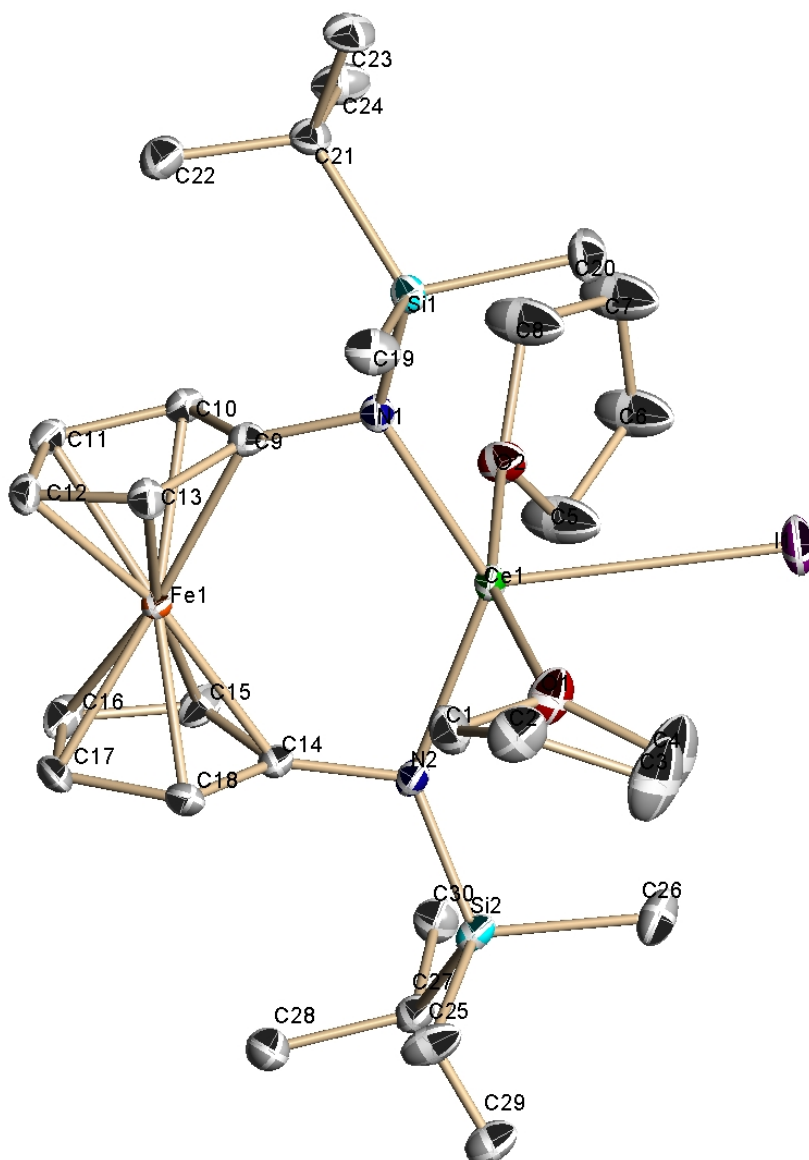

**Figure S1.** Thermal-ellipsoid (50% probability) representation of one of the two crystallographically independent molecules of (NN<sup>TBS</sup>)CeI(THF)<sub>2</sub>. Hydrogen atoms were omitted for clarity.

Crystal data for C<sub>30</sub>H<sub>54</sub>IFeCeO<sub>2</sub>N<sub>2</sub>Si<sub>2</sub>; M<sub>r</sub> = 853.80; triclinic; space group P-1; *a* = 11.347(3) Å; *b* = 11.360(3) Å; *c* = 16.303(7) Å; α = 99.150(5)°; β = 93.557(5)°; γ = 118.858(3)°; V = 1793.7(11) Å<sup>3</sup>; Z = 2; T = 100(2) K; λ = 0.71073 Å; μ = 2.612 mm<sup>-1</sup>; d<sub>calc</sub> = 1.581 g·cm<sup>-3</sup>; 25177 reflections collected; 10133 unique (R<sub>int</sub> = 0.0242); giving R<sub>1</sub> = 0.0330 for 8971 data with [I > 2σ(I)] and R<sub>1</sub> = 0.0380, wR<sub>2</sub> = 0.0790 for all 10133 data. Residual electron density (e<sup>-</sup>·Å<sup>-3</sup>) max/min: 1.85/-1.86.

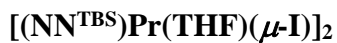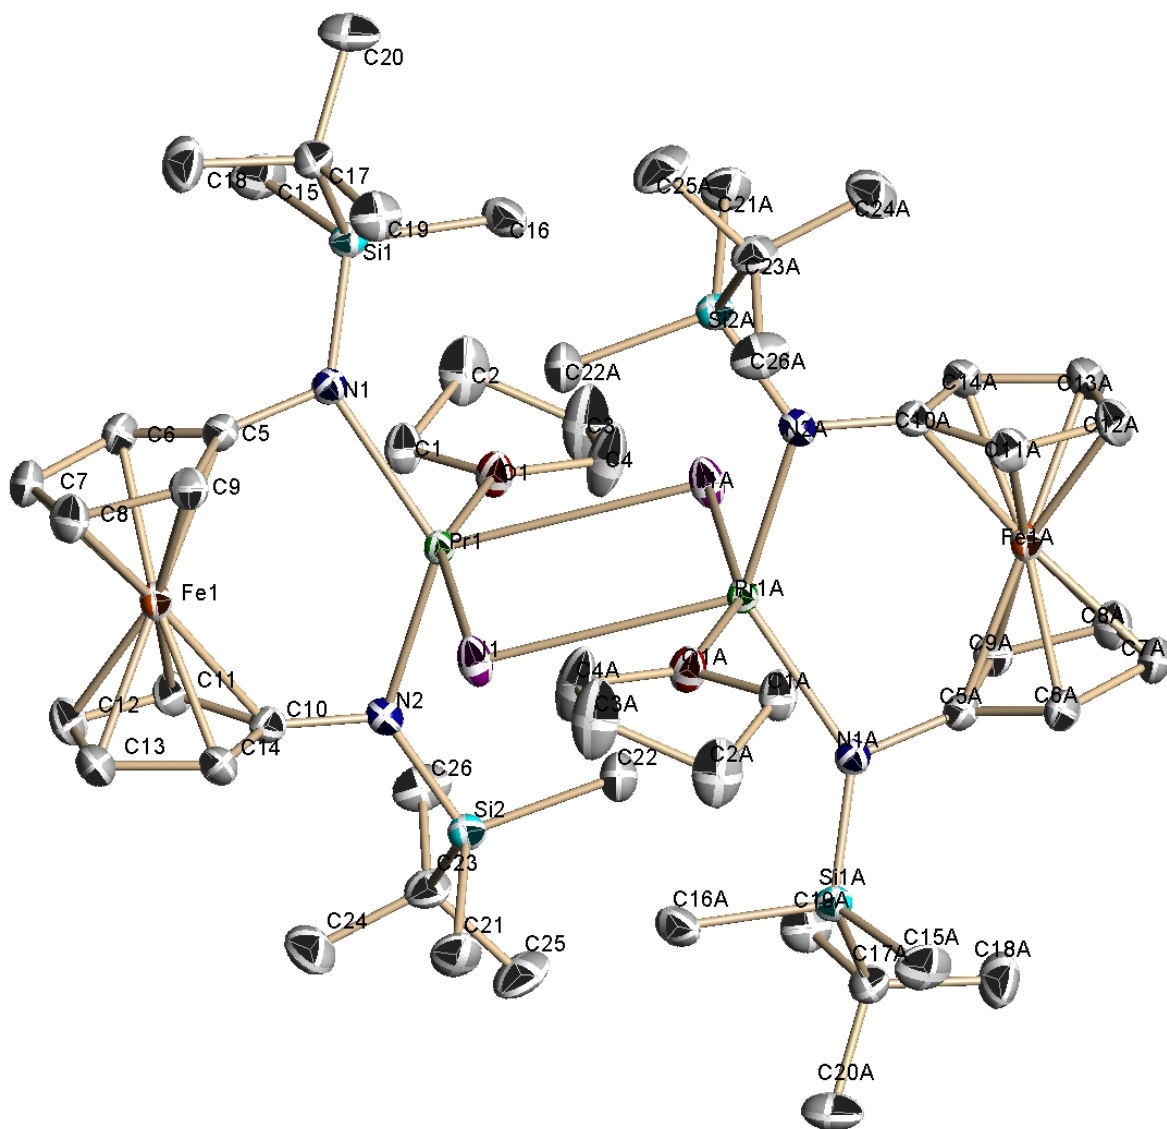

**Figure S2.** Thermal-ellipsoid (50% probability) representation of  $[(\text{NN}^{\text{TBS}})\text{Pr}(\text{THF})(\mu\text{-I})_2]$ . Hydrogen atoms were omitted for clarity.

Crystal data for  $\text{C}_{52}\text{H}_{92}\text{Fe}_2\text{I}_2\text{N}_4\text{O}_2\text{Si}_4\text{Pr}_2$ ;  $M_r = 1564.98$ ; monoclinic; space group  $P21/n$ ;  $a = 14.879(4)$  Å;  $b = 13.738(4)$  Å;  $c = 15.468(4)$  Å;  $\alpha = 90^\circ$ ;  $\beta = 91.074(3)^\circ$ ;  $\gamma = 90^\circ$ ;  $V = 3161.3(15)$  Å<sup>3</sup>;  $Z = 2$ ;  $T = 100(2)$  K;  $\lambda = 0.71073$  Å;  $\mu = 3.054$  mm<sup>-1</sup>;  $d_{\text{calc}} = 1.644$  g·cm<sup>-3</sup>; 43971 reflections collected; 9270 unique ( $R_{\text{int}} = 0.0283$ ); giving  $R_1 = 0.0226$  for 8022 data with  $[I > 2\sigma(I)]$  and  $R_1 = 0.0299$ ,  $wR_2 = 0.0520$  for all 9270 data. Residual electron density ( $\text{e}^- \cdot \text{\AA}^{-3}$ ) max/min: 0.78/-0.70.

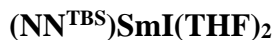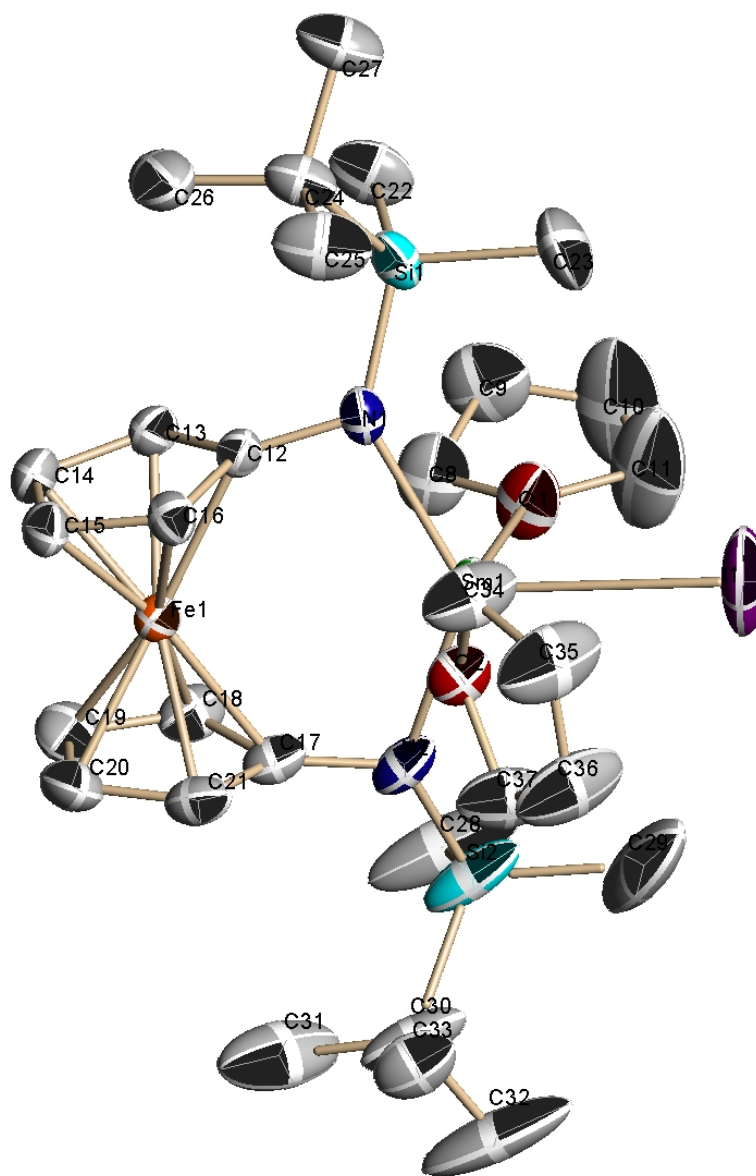

**Figure S3.** Thermal-ellipsoid (50% probability) representation of  $(\text{NN}^{\text{TBS}})\text{SmI}(\text{THF})_2$ . Hydrogen atoms were omitted for clarity.

Crystal data for  $\text{C}_{60}\text{H}_{108}\text{Fe}_2\text{I}_2\text{N}_4\text{O}_2\text{Si}_4\text{Sm}_2$ ;  $M_r = 1728.06$ ; triclinic; space group P-1;  $a = 11.2530(13)$  Å;  $b = 11.6706(13)$  Å;  $c = 16.3205(19)$  Å;  $\alpha = 101.063(1)^\circ$ ;  $\beta = 92.506(1)^\circ$ ;  $\gamma = 118.408(1)^\circ$ ;  $V = 1827.5(4)$  Å<sup>3</sup>;  $Z = 1$ ;  $T = 100(2)$  K;  $\lambda = 0.71073$  Å;  $\mu = 2.925$  mm<sup>-1</sup>;  $d_{\text{calc}} = 1.570$  g·cm<sup>-3</sup>; 25436 reflections collected; 10243 unique ( $R_{\text{int}} = 0.0175$ ); giving  $R_1 = 0.0371$  for 8822 data with  $[I > 2\sigma(I)]$  and  $R_1 = 0.0443$ ,  $wR_2 = 0.0854$  for all 10243 data. Residual electron density (e<sup>-</sup>·Å<sup>-3</sup>) max/min: 1.62/-2.95.

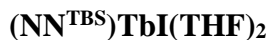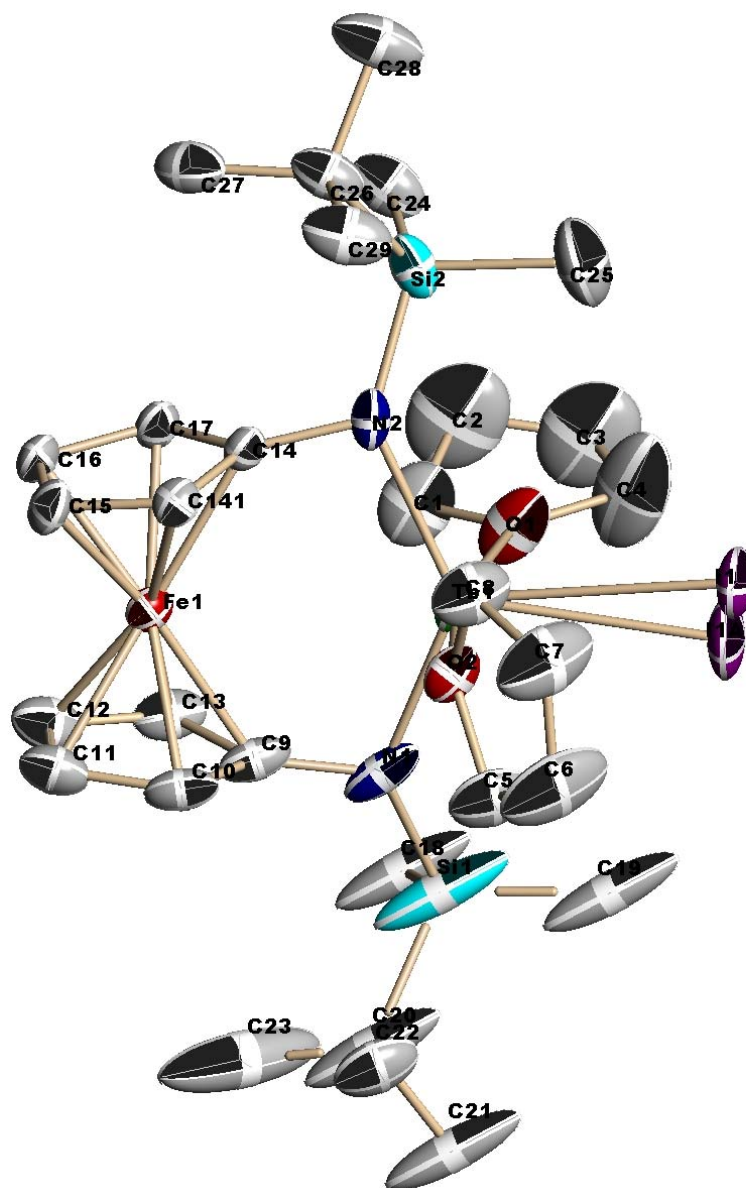

**Figure S4.** Thermal-ellipsoid (50% probability) representation of (NN<sup>TBS</sup>)TbI(THF)<sub>2</sub>. Hydrogen atoms were omitted for clarity.

Crystal data for C<sub>30</sub>H<sub>54</sub>IFeTbO<sub>2</sub>N<sub>2</sub>Si<sub>2</sub>; M<sub>r</sub> = 872.60; triclinic; space group P-1; *a* = 11.130(4) Å; *b* = 11.608(5) Å; *c* = 16.122(9) Å; α = 101.564(6)°; β = 91.881(6)°; γ = 118.404(4)°; V = 1775.0(14) Å<sup>3</sup>; Z = 2; T = 100(2) K; λ = 0.71073 Å; μ = 3.349 mm<sup>-1</sup>; d<sub>calc</sub> = 1.633 g·cm<sup>-3</sup>; 24683 reflections collected; 9991 unique (R<sub>int</sub> = 0.0309); giving R<sub>1</sub> = 0.0589 for 7766 data with [I > 2σ(I)] and R<sub>1</sub> = 0.0791, wR<sub>2</sub> = 0.1467 for all 9991 data. Residual electron density (e<sup>-</sup>·Å<sup>-3</sup>) max/min: 3.07/-5.08.

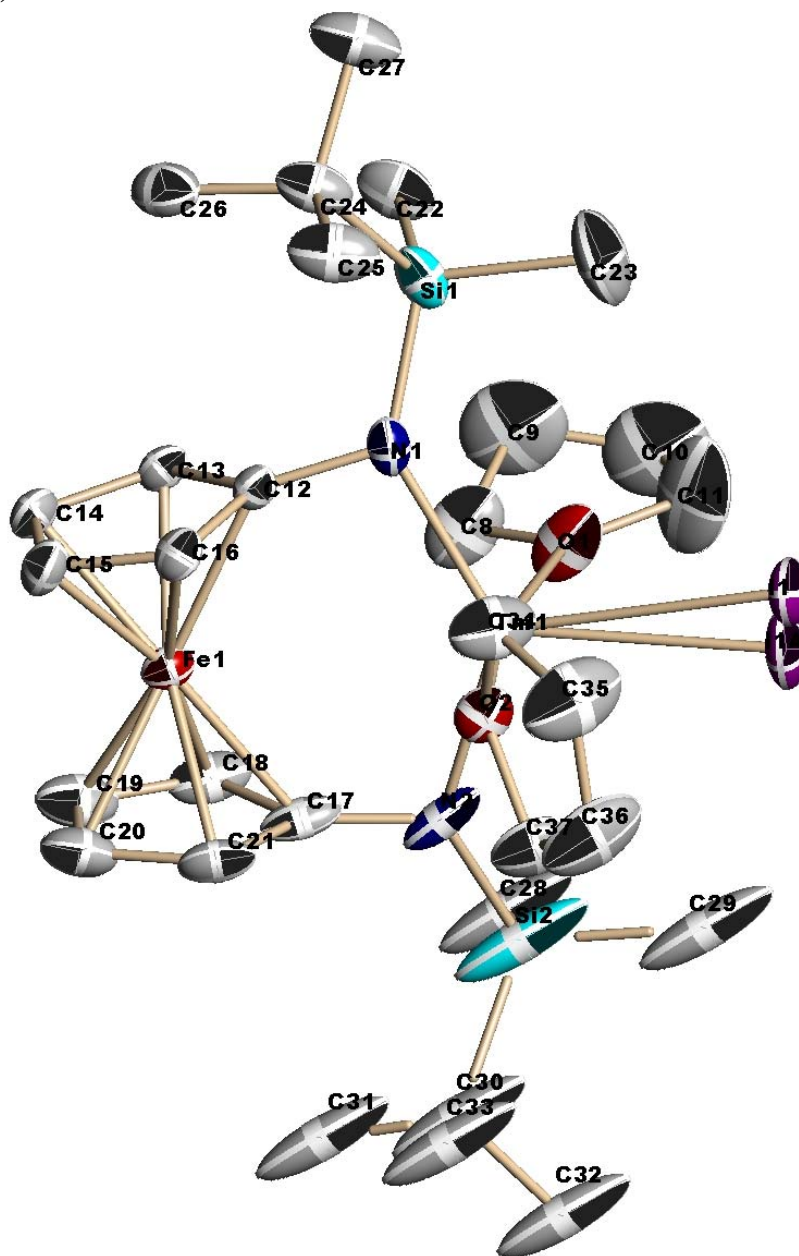

Crystal data for  $\text{C}_{30}\text{H}_{54}\text{IFeTmO}_2\text{N}_2\text{Si}_2$ ;  $M_r = 882.61$ ; triclinic; space group P-1;  $a = 11.140(3) \text{ \AA}$ ;  $b = 11.605(3) \text{ \AA}$ ;  $c = 16.073(7) \text{ \AA}$ ;  $\alpha = 101.474(5)^\circ$ ;  $\beta = 92.374(5)^\circ$ ;  $\gamma = 118.292(3)^\circ$ ;  $V = 1770.9(10) \text{ \AA}^3$ ;  $Z = 2$ ;  $T = 100(2) \text{ K}$ ;  $\lambda = 0.71073 \text{ \AA}$ ;  $\mu = 3.865 \text{ mm}^{-1}$ ;  $d_{\text{calc}} = 1.655 \text{ g}\cdot\text{cm}^{-3}$ ; 24486 reflections collected; 9915 unique ( $R_{\text{int}} = 0.0242$ ); giving  $R_1 = 0.0609$  for 8240 data with  $[I > 2\sigma(I)]$  and  $R_1 = 0.0741$ ,  $wR_2 = 0.1399$  for all 9915 data. Residual electron density ( $\text{e}^- \cdot \text{\AA}^{-3}$ ) max/min: 3.95/-6.27.

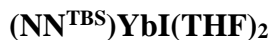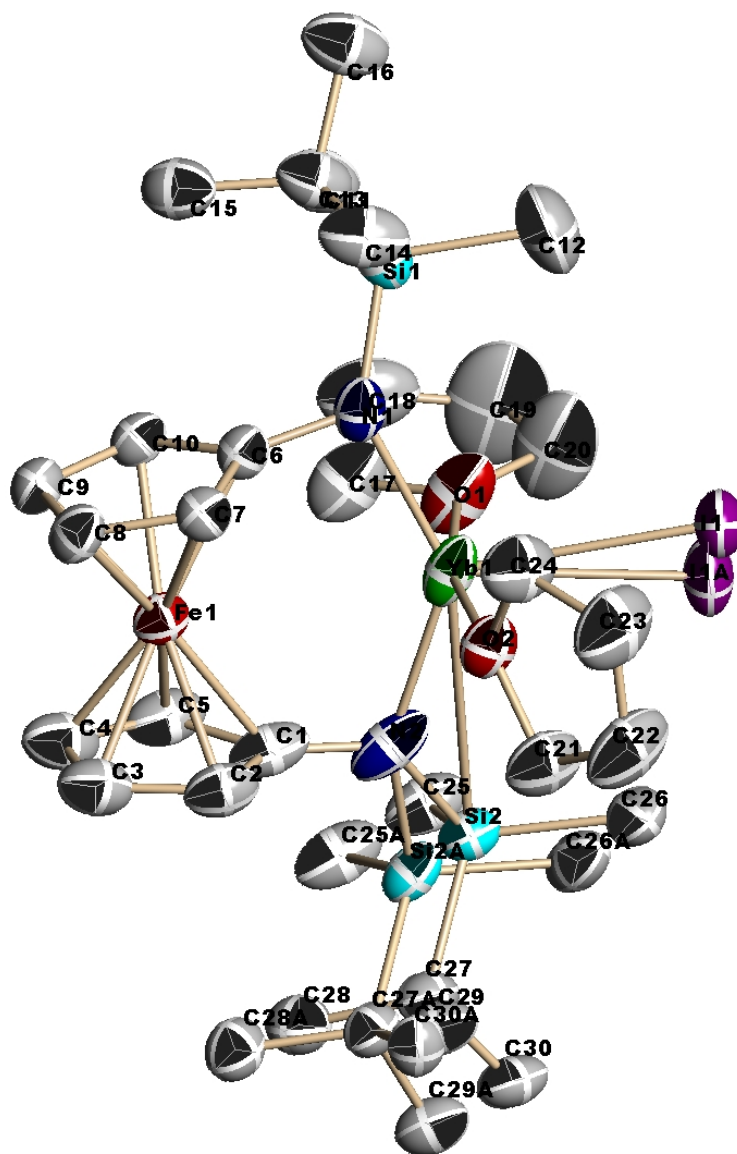

**Figure S6.** Thermal-ellipsoid (50% probability) representation of (NN<sup>TBS</sup>)YbI(THF)<sub>2</sub>. Hydrogen atoms were omitted for clarity.

Crystal data for C<sub>30</sub>H<sub>54</sub>IFeYbO<sub>2</sub>N<sub>2</sub>Si<sub>2</sub>; M<sub>r</sub> = 886.72; triclinic; space group P-1; *a* = 11.5979(17) Å; *b* = 11.6945(17) Å; *c* = 16.109(2) Å; α = 76.069(2)°; β = 78.510(2)°; γ = 56.888(2)°; V = 1770.1(4) Å<sup>3</sup>; Z = 2; T = 100(2) K; λ = 0.71073 Å; μ = 4.002 mm<sup>-1</sup>; d<sub>calc</sub> = 1.664 g·cm<sup>-3</sup>; 15984 reflections collected; crystal was a two component twin and refined, BASF was 0.48. B-level alert PLAT\_ALERT\_1\_B and 4\_B should be ignored as data was not merged due to twinning. C19 and C18 are THF carbons with some disorder; giving R<sub>1</sub> = 0.0420 for 13789 data with [I>2σ(I)] and R<sub>1</sub> = 0.0478, wR<sub>2</sub> = 0.1074 for all 15982 data. Residual electron density (e<sup>-</sup>·Å<sup>-3</sup>) max/min: 3.24/-4.73.



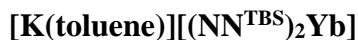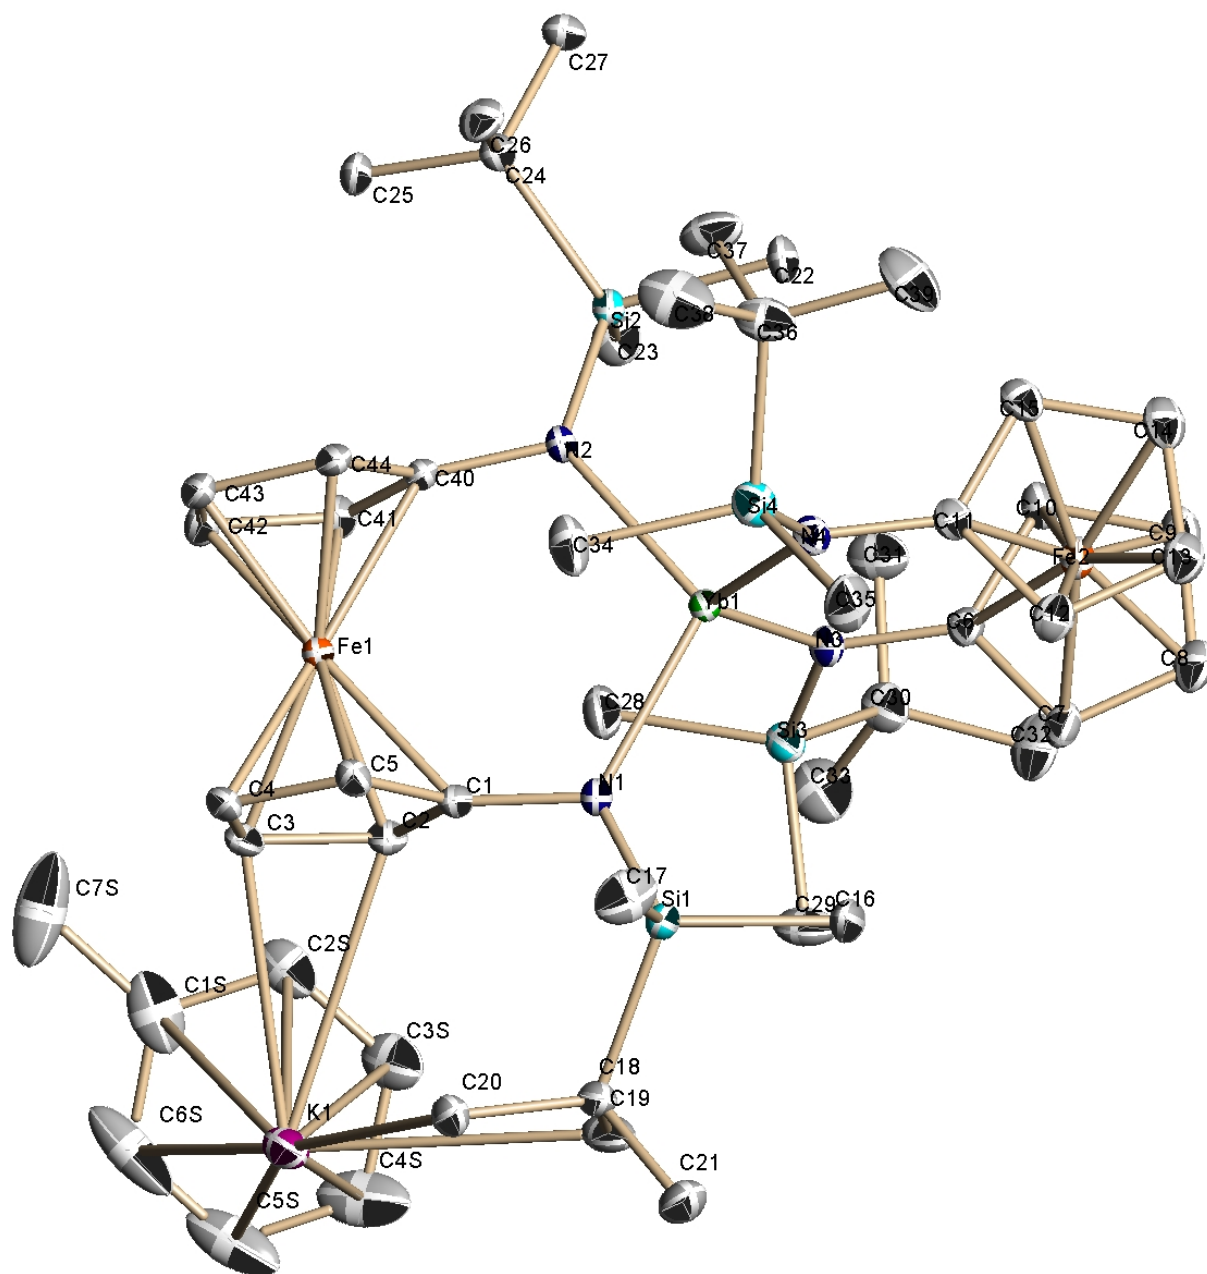

**Figure S7.** Thermal-ellipsoid (50% probability) representation of [K(toluene)][(NN<sup>TBS</sup>)<sub>2</sub>Yb]. Hydrogen atoms were omitted for clarity.

Crystal data for C<sub>51</sub>H<sub>84</sub>KFe<sub>2</sub>YbN<sub>4</sub>Si<sub>4</sub>; M<sub>r</sub> = 1189.42; orthorhombic; space group P212121; *a* = 13.541(2) Å; *b* = 19.611(3) Å; *c* = 20.563(3) Å; V = 5460.6(15) Å<sup>3</sup>; Z = 4; T = 100(2) K; λ = 0.71073 Å; μ = 2.424 mm<sup>-1</sup>; d<sub>calc</sub> = 1.447 g·cm<sup>-3</sup>; 76900 reflections collected; 16119 unique (R<sub>int</sub> = 0.0417); giving R<sub>1</sub> = 0.0298 for 14904 data with [I > 2σ(I)] and R<sub>1</sub> = 0.0310, wR<sub>2</sub> = 0.0761 for all 16119 data. Residual electron density (e<sup>-</sup>·Å<sup>-3</sup>) max/min: 2.56/-1.45.



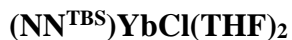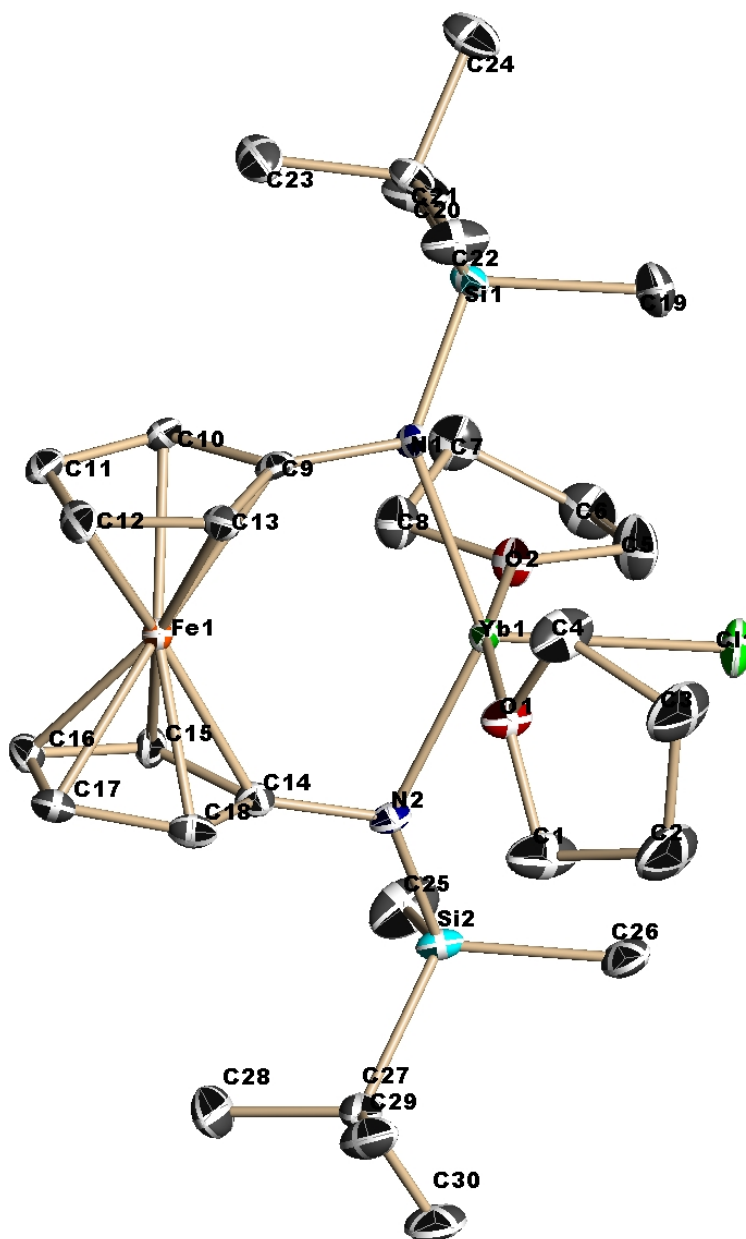

**Figure S8.** Thermal-ellipsoid (50% probability) representation of (NN<sup>TBS</sup>)YbCl(THF)<sub>2</sub>. Hydrogen atoms were omitted for clarity.

Crystal data for C<sub>30</sub>H<sub>54</sub>ClFeYbO<sub>2</sub>N<sub>2</sub>Si<sub>2</sub>; M<sub>r</sub> = 795.27; triclinic; space group P-1; *a* = 10.605(4) Å; *b* = 11.350(4) Å; *c* = 16.204(6) Å; α = 100.677(4)°; β = 94.486(4)°; γ = 114.277(4)°; V = 1721.0(10) Å<sup>3</sup>; Z = 2; T = 100(2) K; λ = 0.71073 Å; μ = 3.297 mm<sup>-1</sup>; d<sub>calc</sub> = 1.535 g·cm<sup>-3</sup>; 22731 reflections collected; 6916 unique (R<sub>int</sub> = 0.0309); giving R<sub>1</sub> = 0.0347 for 6277 data with [I > 2σ(I)] and R<sub>1</sub> = 0.0380, wR<sub>2</sub> = 0.0945 for all 6916 data. Residual electron density (e<sup>-</sup>·Å<sup>-3</sup>) max/min: 3.03/-1.01.
